# Supplementary material for: Statistical investigations of protein residue direct couplings
Source: PubMed Central journal article supplement (PMC6329532; doi:10.1371/journal.pcbi.1006237), 2018-12-31
Supplement: pcbi.1006237.s001.pdf [file pcbi.1006237.s001.pdf]

**S1 Table.** Protein structural coordinates used for the Ran GTPase analysis in Fig 4.

| <b>PDB</b>   | <b>S</b> | <b>Description</b>                                                                    | <b>Resol. (Å)</b> |
|--------------|----------|---------------------------------------------------------------------------------------|-------------------|
| <b>1A2KC</b> | 79       | Gdpran-Ntf2 Complex                                                                   | 2.5               |
| 1A2KD        | 83       | Gdpran-Ntf2 Complex                                                                   | 2.5               |
| 1A2KE        | 85       | Gdpran-Ntf2 Complex                                                                   | 2.5               |
| 1IBRA        | 82       | Complex Of Ran With Importin Beta                                                     | 2.3               |
| 1IBRC        | 81       | Complex Of Ran With Importin Beta                                                     | 2.3               |
| <b>1K5DA</b> | 70       | Ran-Gppnhp-Ranbp1-Rangap Complex                                                      | 2.7               |
| <b>1K5DD</b> | 71       | Ran-Gppnhp-Ranbp1-Rangap Complex                                                      | 2.7               |
| <b>1K5DG</b> | 69       | Ran-Gppnhp-Ranbp1-Rangap Complex                                                      | 2.7               |
| <b>1K5DJ</b> | 73       | Ran-Gppnhp-Ranbp1-Rangap Complex                                                      | 2.7               |
| <b>1K5GA</b> | 95       | Ran-Gdp-Alfx-Ranbp1-Rangap Complex                                                    | 3.1               |
| <b>1K5GD</b> | 96       | Ran-Gdp-Alfx-Ranbp1-Rangap Complex                                                    | 3.1               |
| <b>1K5GG</b> | 93       | Ran-Gdp-Alfx-Ranbp1-Rangap Complex                                                    | 3.1               |
| <b>1K5GJ</b> | 95       | Ran-Gdp-Alfx-Ranbp1-Rangap Complex                                                    | 3.1               |
| 3A6PC        | 73       | Exportin-5:rangtp:pre-Mirna Complex                                                   | 2.92              |
| 3A6PH        | 77       | Exportin-5:rangtp:pre-Mirna Complex                                                   | 2.92              |
| 4GPTA        | 84       | Kpt251 With Crm1-ran-ranbp1                                                           | 2.22              |
| 4GMXA        | 78       | Kpt185 With Crm1-Ran-Ranbp1                                                           | 2.1               |
| 4HATA        | 77       | Crm1 Inhibitor Leptomycin B With Crm1- Ran-ranbp1                                     | 1.78              |
| 4HAUA        | 96       | Crm1 Inhibitor Rafjadone A With Crm1- Ran-ranbp1                                      | 2                 |
| 4HAVA        | 76       | Crm1 Inhibitor Anguinomycin A With Crm1-ran-ranbp1                                    | 2                 |
| 4HAWA        | 78       | Crm1 Inhibitor Leptomycin B With Crm1(K548A)-ran-ranbp1                               | 1.9               |
| 4HAXA        | 84       | Crm1 Inhibitor Rafjadone A With Crm1(K579A)-ran-ranbp1                                | 2.28              |
| 4HAYA        | 70       | Crm1 Inhibitor Leptomycin B With Crm1(K548E,K579Q)-ran-ranbp1                         | 2.3               |
| 4HAZA        | 83       | Crm1 Inhibitor Leptomycin B With Crm1(R543S,K548E,K579Q)-ran-ranbp1                   | 1.9               |
| 4HB0A        | 79       | Crm1 Inhibitor Leptomycin B With Crm1(K541Q,K542Q,R543S,K545Q,K548Q,K579Q)-ran-ranbp1 | 2.2               |
| <b>4HB2A</b> | 83       | Crm1-ran-ranbp1                                                                       | 1.8               |
| 4HB3A        | 76       | Crm1(t539s)-ran-ranbp1 With Weakly Bound Unmodeled Leptomycin B                       | 2.8               |
| 4HB4A        | 78       | Crm1 Inhibitor Leptomycin B With Crm1(537dltkv541/glceq)-ran-ranbp1                   | 2.05              |
| 4OLOA        | 99       | Transportin-sr2, A Karyopherin Involved In Human Disease, In Complex With Ran         | 2.9               |
| 4VVFA        | 75       | Kpt276 In Complex With Crm1-ran-ranbp1                                                | 1.8               |
| 5CIQA        | 85       | Ran Gdp Wild Type Tetragonal Crystal Form                                             | 1.65              |
| 5CIQB        | 94       | Ran Gdp Wild Type Tetragonal Crystal Form                                             | 1.65              |
| 5CITA        | 91       | Ran Gdp Wild Type Monoclinic Crystal Form                                             | 1.75              |
| 5CITB        | 92       | Ran Gdp Wild Type Monoclinic Crystal Form                                             | 1.75              |
| <b>3GJ0A</b> | 82       | Human Rangdp                                                                          | 1.48              |
| <b>3GJ0B</b> | 74       | Human Rangdp                                                                          | 1.48              |
| 3GJ3A        | 97       | Human Rangdp-Nup153znf2 Complex                                                       | 1.79              |
| 5DH9A        | 74       | Pki Nes Flip Mutant Peptide In Complex With Crm1- Ran-ranbp1                          | 2.55              |
| 5DHAA        | 73       | Cpeb4 Nes Reverse Mutant Peptide In Complex With Crm1-ran-ranbp1                      | 2.95              |
| 5DHFA        | 72       | Hrio2 Nes Peptide In Complex With Crm1-ran-ranbp1                                     | 2.29              |
| 5DI9A        | 76       | Hrio2 Nes Reverse Mutant Peptide In Complex With Crm1-ran-ranbp1                      | 2.28              |
| 5DIFA        | 75       | Cpeb4 Nes Peptide In Complex With Crm1-ran-ranbp1                                     | 2.09              |
| 5JLJA        | 75       | Kpt8602 In Complex With Crm1-ran-ranbp1                                               | 2.5               |
| 5UWHA        | 68       | Paxillin Nes Peptide In Complex With Crm1-ran- Ranbp1                                 | 2.26              |
| 5UWIA        | 62       | Hdac5 Nes Peptide In Complex With Crm1-ran-ranbp1                                     | 2.14              |
| 5UWJA        | 65       | Fmrp Nes Peptide In Complex With Crm1-ran-ranbp1                                      | 2.22              |
| 5UWOA        | 71       | Engineered Fmrp-1b Nes Peptide In Complex With Crm1-ran-ranbp1                        | 2.35              |
| 5UWPA        | 70       | Mdia2 Nes Peptide In Complex With Crm1-ran-ranbp1                                     | 2.05              |
| 5UWQA        | 74       | Cdc7 Nes Peptide In Complex With Crm1-ran-ranbp1                                      | 2.28              |
| 5UWRA        | 79       | Cdc7 Nes Peptide (extended) In Complex With Crm1- Ran-ranbp1                          | 2.24              |
| 5UWSA        | 66       | X11l2 Nes Peptide In Complex With Crm1-ran-ranbp1                                     | 2.4               |
| 5UWTA        | 74       | Hxk2 Peptide In Complex With Crm1 K579a Mutant- Ran-ranbp1                            | 2.34              |
| 5UWUA        | 77       | Smad4 Nes Peptide In Complex With Crm1-ran-ranbp1                                     | 2.34              |
| 5UWWA        | 66       | Deaf1 Peptide In Complex With Crm1 K579a Mutant- Ran-ranbp1                           | 2.15              |
| <b>1RRPA</b> | 72       | Ran-Gppnhp-Ranbd1 Complex                                                             | 2.96              |
| <b>1RRPC</b> | 77       | Ran-Gppnhp-Ranbd1 Complex                                                             | 2.96              |
| 5CLLA        | 74       | Truncated Ran Wild Type In Complex With Gdp-bef And Ranbd1                            | 2.45              |
| 5CLLC        | 71       | Truncated Ran Wild Type In Complex With Gdp-bef And Ranbd1                            | 2.45              |
| 1WA5A        | 81       | The Exportin Cse1p Complexed With Its Cargo (Kap60p) And Rangtp                       | 2                 |
| 3W3ZB        | 77       | Kap121p Bound To RanGTP                                                               | 2.7               |
