# Supplementary material for: Statistical investigations of protein residue direct couplings
Source: PubMed Central journal article supplement (PMC6329532; doi:10.1371/journal.pcbi.1006237), 2018-12-31
Supplement: pcbi.1006237.s002.pdf [file pcbi.1006237.s002.pdf]

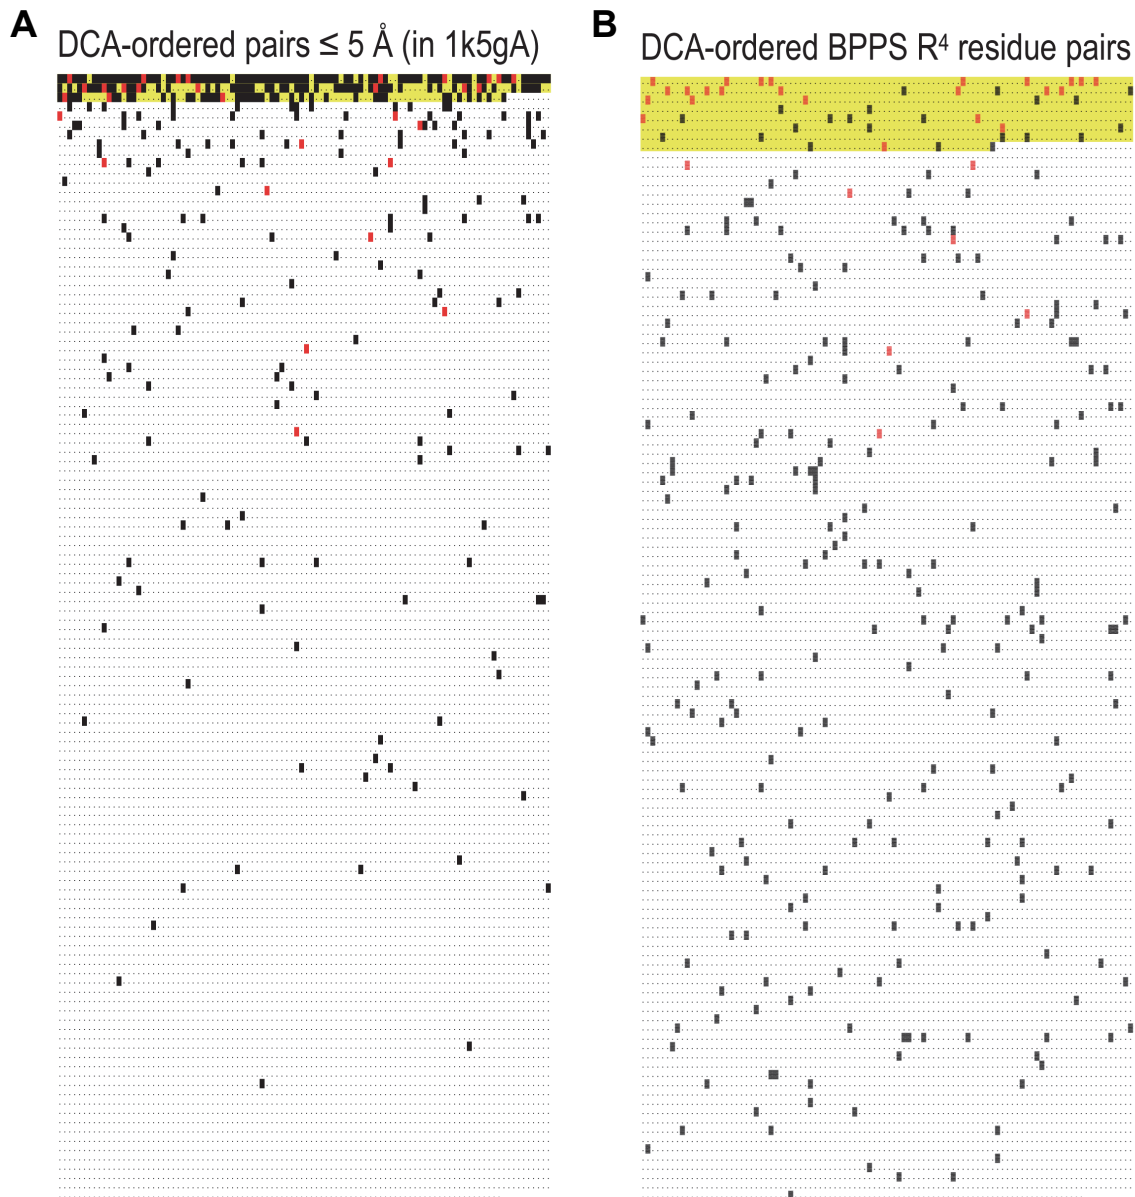

**S1 Fig.** Distinguished residue pairs within an array of length  $L = 12,090$ , ordered by DC scores for Ran GTPase (pdb: 1k5g), as computed by CCMpred using the R<sup>4</sup> MSA (see Table 4). Distinguished pairs are represented by black and red blocks, the latter indicating pairs common to panels A and B; the remaining pairs are represented by dots. The region up to each cut point  $X$  is highlighted in yellow. **A.** Distinguished elements are those pairs separated by  $\leq 5 \text{ \AA}$  in chain A of 1k5g. ICA results:  $S = 230$ ;  $D = 346$ ;  $X = 291$ ;  $d = 186$ ; 54% of the distinguished pairs ( $d/D$ ) occur in the initial 2.4% of the array ( $X/L$ ). **B.** Distinguished elements are pairs of the 25 residues found by the BPPS program to be most distinctive of R<sup>4</sup> GTPases. ICA results:  $S = 6.2$ ;  $D = 281$ ;  $X = 772$ ;  $d = 46$ ; 16% of the distinguished pairs occur in the initial 6.4% of the array. Note that because no ranking is available for the distinguished pairs in panel B we calculate  $S$  for both panels without the ball-in-urn component  $P_b$  and using only  $P_a$  [14].
